# Supplementary material for: Immunotherapy Targeting HPV16/18 Generates Potent Immune Responses in HPV-Associated Head and Neck Cancer
Source: Oxford University Press journal article supplement (doi:10.1158/1078-0432.ccr-18-1763), 2018-09-21
Supplement: 10780432ccr181763-sup-203035_2_supp_5023856_p5wk00.docx [file 10780432ccr181763-sup-203035_2_supp_5023856_p5wk00.docx]

**Supplementary Table 1**: **Adverse Events Amongst All Patients Treated on Trial (n=22)**

| **System Organ Class Preferred Term** | **Subject Count (%) by Severity Grade** | | | | | |
| --- | --- | --- | --- | --- | --- | --- |
| **Grade 1** | **Grade 2** | **Grade 3** | **Grade 4** | **Grade 5** | **Total** |
| **Any adverse events** | **20 (90.9)** | **12 (54.5)** | **2 ( 9.1)** | **1 ( 4.5)** | **0 ( 0.0)** | **21 (95.5)** |
| **Ear and labyrinth disorders** | **1 ( 4.5)** | **1 ( 4.5)** | **0 ( 0.0)** | **0 ( 0.0)** | **0 ( 0.0)** | **2 ( 9.1)** |
| Tinnitus | 1 ( 4.5) | 1 ( 4.5) | 0 ( 0.0) | 0 ( 0.0) | 0 ( 0.0) | 2 ( 9.1) |
| **Endocrine disorders** | **1 ( 4.5)** | **1 ( 4.5)** | **0 ( 0.0)** | **0 ( 0.0)** | **0 ( 0.0)** | **2 ( 9.1)** |
| Hypothyroidism | 0 ( 0.0) | 1 ( 4.5) | 0 ( 0.0) | 0 ( 0.0) | 0 ( 0.0) | 1 ( 4.5) |
| Thyroiditis | 1 ( 4.5) | 0 ( 0.0) | 0 ( 0.0) | 0 ( 0.0) | 0 ( 0.0) | 1 ( 4.5) |
| **Eye disorders** | **1 ( 4.5)** | **1 ( 4.5)** | **1 ( 4.5)** | **0 ( 0.0)** | **0 ( 0.0)** | **2 ( 9.1)** |
| Diplopia | 1 ( 4.5) | 0 ( 0.0) | 1 ( 4.5) | 0 ( 0.0) | 0 ( 0.0) | 1 ( 4.5) |
| Retinal detachment | 0 ( 0.0) | 1 ( 4.5) | 0 ( 0.0) | 0 ( 0.0) | 0 ( 0.0) | 1 ( 4.5) |
| **Gastrointestinal disorders** | **7 (31.8)** | **5 (22.7)** | **0 ( 0.0)** | **0 ( 0.0)** | **0 ( 0.0)** | **9 (40.9)** |
| Dry mouth | 3 (13.6) | 0 ( 0.0) | 0 ( 0.0) | 0 ( 0.0) | 0 ( 0.0) | 3 (13.6) |
| Dysphagia | 2 ( 9.1) | 2 ( 9.1) | 0 ( 0.0) | 0 ( 0.0) | 0 ( 0.0) | 4 (18.2) |
| Eructation | 1 ( 4.5) | 0 ( 0.0) | 0 ( 0.0) | 0 ( 0.0) | 0 ( 0.0) | 1 ( 4.5) |
| Gastrooesophageal reflux disease | 2 ( 9.1) | 1 ( 4.5) | 0 ( 0.0) | 0 ( 0.0) | 0 ( 0.0) | 3 (13.6) |
| Glossodynia | 0 ( 0.0) | 1 ( 4.5) | 0 ( 0.0) | 0 ( 0.0) | 0 ( 0.0) | 1 ( 4.5) |
| Hypoaesthesia oral | 1 ( 4.5) | 0 ( 0.0) | 0 ( 0.0) | 0 ( 0.0) | 0 ( 0.0) | 1 ( 4.5) |
| Nausea | 0 ( 0.0) | 1 ( 4.5) | 0 ( 0.0) | 0 ( 0.0) | 0 ( 0.0) | 1 ( 4.5) |
| Odynophagia | 1 ( 4.5) | 0 ( 0.0) | 0 ( 0.0) | 0 ( 0.0) | 0 ( 0.0) | 1 ( 4.5) |
| Oral discomfort | 1 ( 4.5) | 0 ( 0.0) | 0 ( 0.0) | 0 ( 0.0) | 0 ( 0.0) | 1 ( 4.5) |
| Oral pain | 0 ( 0.0) | 1 ( 4.5) | 0 ( 0.0) | 0 ( 0.0) | 0 ( 0.0) | 1 ( 4.5) |
| Salivary duct inflammation | 1 ( 4.5) | 0 ( 0.0) | 0 ( 0.0) | 0 ( 0.0) | 0 ( 0.0) | 1 ( 4.5) |
| Stomatitis | 1 ( 4.5) | 0 ( 0.0) | 0 ( 0.0) | 0 ( 0.0) | 0 ( 0.0) | 1 ( 4.5) |
| Tongue discolouration | 1 ( 4.5) | 0 ( 0.0) | 0 ( 0.0) | 0 ( 0.0) | 0 ( 0.0) | 1 ( 4.5) |
| Tongue oedema | 1 ( 4.5) | 0 ( 0.0) | 0 ( 0.0) | 0 ( 0.0) | 0 ( 0.0) | 1 ( 4.5) |
| Toothache | 1 ( 4.5) | 0 ( 0.0) | 0 ( 0.0) | 0 ( 0.0) | 0 ( 0.0) | 1 ( 4.5) |
| **General disorders and administration site conditions** | **16 (72.7)** | **4 (18.2)** | **1 ( 4.5)** | **0 ( 0.0)** | **0 ( 0.0)** | **17 (77.3)** |
| Chest pain | 1 ( 4.5) | 0 ( 0.0) | 0 ( 0.0) | 0 ( 0.0) | 0 ( 0.0) | 1 ( 4.5) |
| Fatigue | 2 ( 9.1) | 0 ( 0.0) | 1 ( 4.5) | 0 ( 0.0) | 0 ( 0.0) | 3 (13.6) |
| Injection site bruising | 5 (22.7) | 0 ( 0.0) | 0 ( 0.0) | 0 ( 0.0) | 0 ( 0.0) | 5 (22.7) |
| Injection site erythema | 7 (31.8) | 0 ( 0.0) | 0 ( 0.0) | 0 ( 0.0) | 0 ( 0.0) | 7 (31.8) |
| Injection site induration | 1 ( 4.5) | 0 ( 0.0) | 0 ( 0.0) | 0 ( 0.0) | 0 ( 0.0) | 1 ( 4.5) |
| Injection site pain | 15 (68.2) | 0 ( 0.0) | 0 ( 0.0) | 0 ( 0.0) | 0 ( 0.0) | 15 (68.2) |
| Injection site swelling | 4 (18.2) | 1 ( 4.5) | 0 ( 0.0) | 0 ( 0.0) | 0 ( 0.0) | 5 (22.7) |
| Localised oedema | 1 ( 4.5) | 1 ( 4.5) | 0 ( 0.0) | 0 ( 0.0) | 0 ( 0.0) | 2 ( 9.1) |
| Mucosal inflammation | 0 ( 0.0) | 2 ( 9.1) | 0 ( 0.0) | 0 ( 0.0) | 0 ( 0.0) | 2 ( 9.1) |
| **Immune system disorders** | **1 ( 4.5)** | **0 ( 0.0)** | **0 ( 0.0)** | **1 ( 4.5)** | **0 ( 0.0)** | **2 ( 9.1)** |
| Anaphylactic reaction | 0 ( 0.0) | 0 ( 0.0) | 0 ( 0.0) | 1 ( 4.5) | 0 ( 0.0) | 1 ( 4.5) |
| Seasonal allergy | 1 ( 4.5) | 0 ( 0.0) | 0 ( 0.0) | 0 ( 0.0) | 0 ( 0.0) | 1 ( 4.5) |
| **Infections and infestations** | **5 (22.7)** | **4 (18.2)** | **1 ( 4.5)** | **0 ( 0.0)** | **0 ( 0.0)** | **7 (31.8)** |
| Epididymitis | 0 ( 0.0) | 1 ( 4.5) | 0 ( 0.0) | 0 ( 0.0) | 0 ( 0.0) | 1 ( 4.5) |
| Folliculitis | 1 ( 4.5) | 0 ( 0.0) | 0 ( 0.0) | 0 ( 0.0) | 0 ( 0.0) | 1 ( 4.5) |
| Furuncle | 1 ( 4.5) | 1 ( 4.5) | 0 ( 0.0) | 0 ( 0.0) | 0 ( 0.0) | 2 ( 9.1) |
| Herpes zoster | 0 ( 0.0) | 1 ( 4.5) | 0 ( 0.0) | 0 ( 0.0) | 0 ( 0.0) | 1 ( 4.5) |
| Oral candidiasis | 3 (13.6) | 0 ( 0.0) | 0 ( 0.0) | 0 ( 0.0) | 0 ( 0.0) | 3 (13.6) |
| Oral herpes | 0 ( 0.0) | 1 ( 4.5) | 0 ( 0.0) | 0 ( 0.0) | 0 ( 0.0) | 1 ( 4.5) |
| Staphylococcal infection | 0 ( 0.0) | 0 ( 0.0) | 1 ( 4.5) | 0 ( 0.0) | 0 ( 0.0) | 1 ( 4.5) |
| Upper respiratory tract infection | 0 ( 0.0) | 1 ( 4.5) | 0 ( 0.0) | 0 ( 0.0) | 0 ( 0.0) | 1 ( 4.5) |
| Urinary tract infection | 0 ( 0.0) | 1 ( 4.5) | 0 ( 0.0) | 0 ( 0.0) | 0 ( 0.0) | 1 ( 4.5) |
| Viral upper respiratory tract infection | 1 ( 4.5) | 0 ( 0.0) | 0 ( 0.0) | 0 ( 0.0) | 0 ( 0.0) | 1 ( 4.5) |
| **Injury, poisoning and procedural complications** | **0 ( 0.0)** | **3 (13.6)** | **0 ( 0.0)** | **0 ( 0.0)** | **0 ( 0.0)** | **3 (13.6)** |
| Ankle fracture | 0 ( 0.0) | 1 ( 4.5) | 0 ( 0.0) | 0 ( 0.0) | 0 ( 0.0) | 1 ( 4.5) |
| Post procedural haemorrhage | 0 ( 0.0) | 1 ( 4.5) | 0 ( 0.0) | 0 ( 0.0) | 0 ( 0.0) | 1 ( 4.5) |
| Procedural pain | 0 ( 0.0) | 1 ( 4.5) | 0 ( 0.0) | 0 ( 0.0) | 0 ( 0.0) | 1 ( 4.5) |
| **Investigations** | **4 (18.2)** | **4 (18.2)** | **0 ( 0.0)** | **0 ( 0.0)** | **0 ( 0.0)** | **5 (22.7)** |
| Blood creatinine increased | 1 ( 4.5) | 0 ( 0.0) | 0 ( 0.0) | 0 ( 0.0) | 0 ( 0.0) | 1 ( 4.5) |
| Thyroid function test abnormal | 0 ( 0.0) | 1 ( 4.5) | 0 ( 0.0) | 0 ( 0.0) | 0 ( 0.0) | 1 ( 4.5) |
| Weight decreased | 3 (13.6) | 3 (13.6) | 0 ( 0.0) | 0 ( 0.0) | 0 ( 0.0) | 4 (18.2) |
| **Metabolism and nutrition disorders** | **3 (13.6)** | **1 ( 4.5)** | **1 ( 4.5)** | **0 ( 0.0)** | **0 ( 0.0)** | **4 (18.2)** |
| Decreased appetite | 1 ( 4.5) | 1 ( 4.5) | 1 ( 4.5) | 0 ( 0.0) | 0 ( 0.0) | 3 (13.6) |
| Dyslipidaemia | 1 ( 4.5) | 0 ( 0.0) | 0 ( 0.0) | 0 ( 0.0) | 0 ( 0.0) | 1 ( 4.5) |
| Hypomagnesaemia | 1 ( 4.5) | 0 ( 0.0) | 0 ( 0.0) | 0 ( 0.0) | 0 ( 0.0) | 1 ( 4.5) |
| Hyponatraemia | 0 ( 0.0) | 0 ( 0.0) | 1 ( 4.5) | 0 ( 0.0) | 0 ( 0.0) | 1 ( 4.5) |
| **Musculoskeletal and connective tissue disorders** | **5 (22.7)** | **2 ( 9.1)** | **0 ( 0.0)** | **0 ( 0.0)** | **0 ( 0.0)** | **7 (31.8)** |
| Joint range of motion decreased | 1 ( 4.5) | 0 ( 0.0) | 0 ( 0.0) | 0 ( 0.0) | 0 ( 0.0) | 1 ( 4.5) |
| Muscle spasms | 1 ( 4.5) | 0 ( 0.0) | 0 ( 0.0) | 0 ( 0.0) | 0 ( 0.0) | 1 ( 4.5) |
| Muscle twitching | 1 ( 4.5) | 0 ( 0.0) | 0 ( 0.0) | 0 ( 0.0) | 0 ( 0.0) | 1 ( 4.5) |
| Musculoskeletal pain | 1 ( 4.5) | 1 ( 4.5) | 0 ( 0.0) | 0 ( 0.0) | 0 ( 0.0) | 2 ( 9.1) |
| Musculoskeletal stiffness | 2 ( 9.1) | 0 ( 0.0) | 0 ( 0.0) | 0 ( 0.0) | 0 ( 0.0) | 2 ( 9.1) |
| Myalgia | 1 ( 4.5) | 0 ( 0.0) | 0 ( 0.0) | 0 ( 0.0) | 0 ( 0.0) | 1 ( 4.5) |
| Neck pain | 1 ( 4.5) | 1 ( 4.5) | 0 ( 0.0) | 0 ( 0.0) | 0 ( 0.0) | 2 ( 9.1) |
| Pain in extremity | 1 ( 4.5) | 0 ( 0.0) | 0 ( 0.0) | 0 ( 0.0) | 0 ( 0.0) | 1 ( 4.5) |
| Pain in jaw | 0 ( 0.0) | 1 ( 4.5) | 0 ( 0.0) | 0 ( 0.0) | 0 ( 0.0) | 1 ( 4.5) |
| Trigger finger | 1 ( 4.5) | 0 ( 0.0) | 0 ( 0.0) | 0 ( 0.0) | 0 ( 0.0) | 1 ( 4.5) |
| Trismus | 1 ( 4.5) | 0 ( 0.0) | 0 ( 0.0) | 0 ( 0.0) | 0 ( 0.0) | 1 ( 4.5) |
| **Neoplasms benign, malignant and unspecified (incl cysts and polyps)** | **0 ( 0.0)** | **1 ( 4.5)** | **1 ( 4.5)** | **0 ( 0.0)** | **0 ( 0.0)** | **2 ( 9.1)** |
| Melanocytic naevus | 0 ( 0.0) | 1 ( 4.5) | 0 ( 0.0) | 0 ( 0.0) | 0 ( 0.0) | 1 ( 4.5) |
| Skin neoplasm bleeding | 0 ( 0.0) | 0 ( 0.0) | 1 ( 4.5) | 0 ( 0.0) | 0 ( 0.0) | 1 ( 4.5) |
| **Nervous system disorders** | **8 (36.4)** | **1 ( 4.5)** | **0 ( 0.0)** | **0 ( 0.0)** | **0 ( 0.0)** | **9 (40.9)** |
| Dizziness | 1 ( 4.5) | 1 ( 4.5) | 0 ( 0.0) | 0 ( 0.0) | 0 ( 0.0) | 2 ( 9.1) |
| Dysgeusia | 3 (13.6) | 0 ( 0.0) | 0 ( 0.0) | 0 ( 0.0) | 0 ( 0.0) | 3 (13.6) |
| Hypoaesthesia | 2 ( 9.1) | 0 ( 0.0) | 0 ( 0.0) | 0 ( 0.0) | 0 ( 0.0) | 2 ( 9.1) |
| Neuropathy peripheral | 2 ( 9.1) | 0 ( 0.0) | 0 ( 0.0) | 0 ( 0.0) | 0 ( 0.0) | 2 ( 9.1) |
| Paraesthesia | 2 ( 9.1) | 0 ( 0.0) | 0 ( 0.0) | 0 ( 0.0) | 0 ( 0.0) | 2 ( 9.1) |
| Peripheral sensory neuropathy | 1 ( 4.5) | 0 ( 0.0) | 0 ( 0.0) | 0 ( 0.0) | 0 ( 0.0) | 1 ( 4.5) |
| Restless legs syndrome | 1 ( 4.5) | 0 ( 0.0) | 0 ( 0.0) | 0 ( 0.0) | 0 ( 0.0) | 1 ( 4.5) |
| **Psychiatric disorders** | **1 ( 4.5)** | **0 ( 0.0)** | **0 ( 0.0)** | **0 ( 0.0)** | **0 ( 0.0)** | **1 ( 4.5)** |
| Depression | 1 ( 4.5) | 0 ( 0.0) | 0 ( 0.0) | 0 ( 0.0) | 0 ( 0.0) | 1 ( 4.5) |
| **Renal and urinary disorders** | **1 ( 4.5)** | **0 ( 0.0)** | **1 ( 4.5)** | **0 ( 0.0)** | **0 ( 0.0)** | **2 ( 9.1)** |
| Acute kidney injury | 0 ( 0.0) | 0 ( 0.0) | 1 ( 4.5) | 0 ( 0.0) | 0 ( 0.0) | 1 ( 4.5) |
| Haematuria | 1 ( 4.5) | 0 ( 0.0) | 0 ( 0.0) | 0 ( 0.0) | 0 ( 0.0) | 1 ( 4.5) |
| **Respiratory, thoracic and mediastinal disorders** | **4 (18.2)** | **2 ( 9.1)** | **0 ( 0.0)** | **0 ( 0.0)** | **0 ( 0.0)** | **5 (22.7)** |
| Cough | 0 ( 0.0) | 1 ( 4.5) | 0 ( 0.0) | 0 ( 0.0) | 0 ( 0.0) | 1 ( 4.5) |
| Dysphonia | 2 ( 9.1) | 1 ( 4.5) | 0 ( 0.0) | 0 ( 0.0) | 0 ( 0.0) | 3 (13.6) |
| Dyspnoea exertional | 1 ( 4.5) | 0 ( 0.0) | 0 ( 0.0) | 0 ( 0.0) | 0 ( 0.0) | 1 ( 4.5) |
| Oropharyngeal pain | 0 ( 0.0) | 1 ( 4.5) | 0 ( 0.0) | 0 ( 0.0) | 0 ( 0.0) | 1 ( 4.5) |
| Pharyngeal oedema | 1 ( 4.5) | 0 ( 0.0) | 0 ( 0.0) | 0 ( 0.0) | 0 ( 0.0) | 1 ( 4.5) |
| Pleuritic pain | 1 ( 4.5) | 0 ( 0.0) | 0 ( 0.0) | 0 ( 0.0) | 0 ( 0.0) | 1 ( 4.5) |
| Productive cough | 1 ( 4.5) | 0 ( 0.0) | 0 ( 0.0) | 0 ( 0.0) | 0 ( 0.0) | 1 ( 4.5) |
| **Skin and subcutaneous tissue disorders** | **7 (31.8)** | **0 ( 0.0)** | **0 ( 0.0)** | **0 ( 0.0)** | **0 ( 0.0)** | **7 (31.8)** |
| Alopecia areata | 1 ( 4.5) | 0 ( 0.0) | 0 ( 0.0) | 0 ( 0.0) | 0 ( 0.0) | 1 ( 4.5) |
| Dermatitis contact | 1 ( 4.5) | 0 ( 0.0) | 0 ( 0.0) | 0 ( 0.0) | 0 ( 0.0) | 1 ( 4.5) |
| Dry skin | 1 ( 4.5) | 0 ( 0.0) | 0 ( 0.0) | 0 ( 0.0) | 0 ( 0.0) | 1 ( 4.5) |
| Erythema | 1 ( 4.5) | 0 ( 0.0) | 0 ( 0.0) | 0 ( 0.0) | 0 ( 0.0) | 1 ( 4.5) |
| Night sweats | 1 ( 4.5) | 0 ( 0.0) | 0 ( 0.0) | 0 ( 0.0) | 0 ( 0.0) | 1 ( 4.5) |
| Rash maculo-papular | 1 ( 4.5) | 0 ( 0.0) | 0 ( 0.0) | 0 ( 0.0) | 0 ( 0.0) | 1 ( 4.5) |
| Rash papular | 1 ( 4.5) | 0 ( 0.0) | 0 ( 0.0) | 0 ( 0.0) | 0 ( 0.0) | 1 ( 4.5) |
| Skin fibrosis | 1 ( 4.5) | 0 ( 0.0) | 0 ( 0.0) | 0 ( 0.0) | 0 ( 0.0) | 1 ( 4.5) |
| Skin lesion | 1 ( 4.5) | 0 ( 0.0) | 0 ( 0.0) | 0 ( 0.0) | 0 ( 0.0) | 1 ( 4.5) |
| **Surgical and medical procedures** | **1 ( 4.5)** | **0 ( 0.0)** | **0 ( 0.0)** | **0 ( 0.0)** | **0 ( 0.0)** | **1 ( 4.5)** |
| Skin neoplasm excision | 1 ( 4.5) | 0 ( 0.0) | 0 ( 0.0) | 0 ( 0.0) | 0 ( 0.0) | 1 ( 4.5) |
| **Vascular disorders** | **2 ( 9.1)** | **1 ( 4.5)** | **0 ( 0.0)** | **0 ( 0.0)** | **0 ( 0.0)** | **3 (13.6)** |
| Arteriosclerosis | 1 ( 4.5) | 0 ( 0.0) | 0 ( 0.0) | 0 ( 0.0) | 0 ( 0.0) | 1 ( 4.5) |
| Hypertension | 1 ( 4.5) | 0 ( 0.0) | 0 ( 0.0) | 0 ( 0.0) | 0 ( 0.0) | 1 ( 4.5) |
| Hypotension | 0 ( 0.0) | 1 ( 4.5) | 0 ( 0.0) | 0 ( 0.0) | 0 ( 0.0) | 1 ( 4.5) |
|  | | | | | | |
